# Supplementary material for: Context Specific Realities and Experiences of Nurses and Midwives in Basic Emergency Obstetric and Newborn Care Services in Two District Hospitals in Rwanda
Source: Research Square preprint supplement (doi:10.21203/rs.3.rs-789796/v1), 2021-09-13
Supplement: Supplementary file [file a1bc4a468cbd2214f3605e12.pdf]

## Consolidated criteria for reporting qualitative research (COREQ) checklist

**Adapted from:** Tong A, Sainsbury P, Craig J. Consolidated criteria for reporting qualitative research (COREQ): a 32-item checklist for interviews and focus groups. *Int J Qual Heal Care*. 2007;19(6):349–57.

| Number and Item                                | Guide questions/responses                                                                                                                                                                                                                                             | Section and page # where reported     |
|------------------------------------------------|-----------------------------------------------------------------------------------------------------------------------------------------------------------------------------------------------------------------------------------------------------------------------|---------------------------------------|
| <b>Domain 1: Research team and reflexivity</b> |                                                                                                                                                                                                                                                                       |                                       |
| <i>Personal Characteristics</i>                |                                                                                                                                                                                                                                                                       |                                       |
| 1. Interviewer                                 | <i>Which author/s conducted the interviews?</i><br>Interviews were conducted by AN and one research assistant (OT) assisted in taking notes and supervising the tape recorder (see Acknowledgments).                                                                  | Methods- data collection, paragraph 2 |
| 2. Credentials                                 | <i>What were the researcher's credentials?</i><br>Aurore Nishimwe, PhD student<br>Daphney Nozizwe Conco, PhD<br>Marc Nyssen, PhD<br>Latifat Ibisomi, PhD                                                                                                              | Title page                            |
| 3. Occupation                                  | <i>What was their occupation at the time of the study?</i><br>AN was a PhD student and DNC, MN and LI were supervisors.                                                                                                                                               | N/A                                   |
| 4. Gender                                      | <i>Were the researchers male or female?</i><br>Both genders were represented.                                                                                                                                                                                         | N/A                                   |
| 5. Experience and training                     | <i>What experience or training did the researcher have?</i><br>AN had training in qualitative research methods during her PhD courses. DNC, MN and LI are conversant with qualitative research methods and have published research studies using qualitative methods. | N/A                                   |
| <i>Relationship with participants</i>          |                                                                                                                                                                                                                                                                       |                                       |
| 6. Relationship established                    | <i>Was a relationship established prior to study commencement?</i><br>No prior relationship was established between interviewers and participants.                                                                                                                    | N/A                                   |
| 7. Participant knowledge of the interviewer    | <i>What did the participants know about the researcher?</i><br>Reasons for conducting the study and institutional affiliations of all researchers were stated in the Participant Information Sheet and Consent Form.                                                  | N/A                                   |
| 8. Interviewer characteristics                 | <i>What characteristics were reported about the interviewer?</i><br>No interviewer characteristics were reported to participants.                                                                                                                                     | N/A                                   |
| <b>Domain 2: study design</b>                  |                                                                                                                                                                                                                                                                       |                                       |
| <i>Theoretical framework</i>                   |                                                                                                                                                                                                                                                                       |                                       |
| 9. Methodological orientation and theory       | <i>What methodological orientation was stated to underpin the study?</i><br>The thematic analysis with an hybrid approach was utilized.                                                                                                                               | Methods- data analysis, paragraph 1   |
| <i>Participant selection</i>                   |                                                                                                                                                                                                                                                                       |                                       |

|                                  |                                                                                                                                                                                                                                                                                                                                                                                                                                                              |                                          |
|----------------------------------|--------------------------------------------------------------------------------------------------------------------------------------------------------------------------------------------------------------------------------------------------------------------------------------------------------------------------------------------------------------------------------------------------------------------------------------------------------------|------------------------------------------|
| 10. Sampling                     | <i>How were participants selected?</i><br>Purposive sampling was utilized.                                                                                                                                                                                                                                                                                                                                                                                   | Methods- data collection, paragraph 1    |
| 11. Method of approach           | <i>How were participants approached?</i><br>Selected nurses and midwives were approached face-to-face.                                                                                                                                                                                                                                                                                                                                                       | Methods- study participants, paragraph 1 |
| 12. Sample size                  | <i>How many participants were in the study?</i><br>26                                                                                                                                                                                                                                                                                                                                                                                                        | Methods- study participants, paragraph 1 |
| 13. Non-participation            | <i>How many people refused to participate or dropped out?</i><br>No individuals refused to participate or dropped out of the study.                                                                                                                                                                                                                                                                                                                          | N/A                                      |
| <i>Setting</i>                   |                                                                                                                                                                                                                                                                                                                                                                                                                                                              |                                          |
| 14. Setting of data collection   | <i>Where was the data collected?</i><br>All interviews were conducted at the district hospitals                                                                                                                                                                                                                                                                                                                                                              | Methods- data collection, paragraph 1    |
| 15. Presence of non-participants | <i>Was anyone else present besides the participants and researchers?</i><br>No, only the participant and interviewers were present. Interviews were held in private rooms at district hospitals.                                                                                                                                                                                                                                                             | Methods- data collection, paragraph 1    |
| 16. Description of sample        | <i>What are the important characteristics of the sample?</i><br>Participants were nurses and midwives with a work experience over 6 months in obstetric care and full-time employed in the selected district hospitals. The average age of participants was 32 years, ranging from 23 to 61 years. Both young and more experienced nurses and midwives were represented in the interviews. Other important participant characteristics are shown in Table 1. | Results, paragraph 1                     |
| <i>Data collection</i>           |                                                                                                                                                                                                                                                                                                                                                                                                                                                              |                                          |
| 17. Interview guide              | <i>Were questions, prompts, guides provided by the authors?</i><br><i>Was it pilot tested?</i><br>The interview guide was developed by the authors and prompts were given during interviews, if needed. Two pilot interviews were conducted.                                                                                                                                                                                                                 | Methods- data collection, paragraph 1    |
| 18. Repeat interviews            | <i>Were repeat interviews carried out?</i><br>No repeat interviews were conducted.                                                                                                                                                                                                                                                                                                                                                                           | N/A                                      |
| 19. Audio/visual recording       | <i>Did the research use audio or visual recording to collect the data?</i><br>All interviews were audio-recorded, with participants' informed consent.                                                                                                                                                                                                                                                                                                       | Methods- data collection, paragraph 2    |
| 20. Field notes                  | <i>Were field notes made during and/or after the interview?</i><br>Field notes were made to record additional information, as necessary.                                                                                                                                                                                                                                                                                                                     | N/A                                      |
| 21. Duration                     | <i>What was the duration of the interviews?</i><br>45-60 minutes                                                                                                                                                                                                                                                                                                                                                                                             | Methods- data collection, paragraph 1    |

|                                        |                                                                                                                                                                                                                 |                                       |
|----------------------------------------|-----------------------------------------------------------------------------------------------------------------------------------------------------------------------------------------------------------------|---------------------------------------|
| 22. Data saturation                    | <i>Was data saturation discussed?</i><br>Yes, participants were recruited until thematic saturation was achieved.                                                                                               | Methods- data collection, paragraph 1 |
| 23. Transcripts returned               | <i>Were transcripts returned to participants for comment and/or correction?</i><br>No                                                                                                                           | N/A                                   |
| <b>Domain 3: analysis and findings</b> |                                                                                                                                                                                                                 |                                       |
| <i>Data analysis</i>                   |                                                                                                                                                                                                                 |                                       |
| 24. Number of data coders              | <i>How many data coders coded the data?</i><br>Two interviews were double-coded by AN and DC. AN coded all remaining interviews.                                                                                | Methods- data analysis, paragraph 1   |
| 25. Description of coding tree         | <i>Did authors provide a description of the coding tree?</i><br>Codes represented distinct viewpoints on each theme and subtheme.                                                                               | N/A                                   |
| 26. Derivation of themes               | <i>Were themes identified in advance or derived from the data?</i><br>Themes were derived from the data collected.                                                                                              | Methods- data analysis, paragraph 1   |
| 27. Software                           | <i>What software, if applicable, was used to manage the data?</i><br>Nvivo 11 Plus software was used to assist in coding.                                                                                       | N/A                                   |
| 28. Participant checking               | <i>Did participants provide feedback on the findings?</i><br>Participants did not provide feedback on the findings; however, findings will be shared with participants upon publication.                        | N/A                                   |
| <i>Reporting</i>                       |                                                                                                                                                                                                                 |                                       |
| 29. Quotations presented               | <i>Were participant quotations presented to illustrate the themes findings? Was each quotation identified?</i><br>Yes, participant quotations were identified by age and duration experience in obstetric care. | Results, all paragraphs               |
| 30. Data and findings consistent       | <i>Was there consistency between the data presented and the findings?</i><br>Yes                                                                                                                                | Discussion, paragraphs 2-12           |
| 31. Clarity of major themes            | <i>Were major themes clearly presented in the findings?</i><br>Major themes resulting from the interviews are listed in figure 1 : Thematic framework.                                                          | Results section                       |
| 32. Clarity of minor themes            | <i>Is there a description of diverse cases or discussion of minor themes?</i><br>Yes, sub-themes were discussed.                                                                                                | Results section                       |
